# Supplementary figures and images for: A Porcine Anterior Segment Perfusion and Transduction Model With Direct Visualization of the Trabecular Meshwork
Source: PubMed Central journal article supplement — Invest Ophthalmol Vis Sci. 2016 Mar 22;57(3):1338–44. doi: 10.1167/iovs.15-18125 (PMC4811178; doi:10.1167/iovs.15-18125), 2016-03-22

**GINSIN 10<sup>7</sup>**

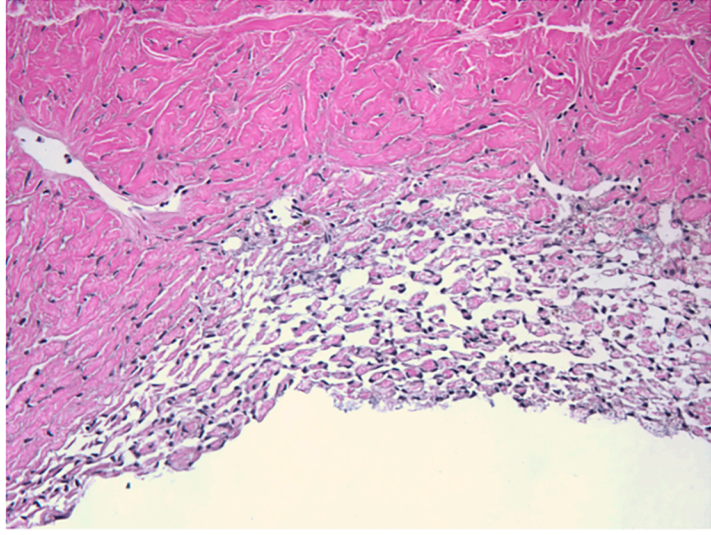

**GINSIN 10<sup>8</sup>**

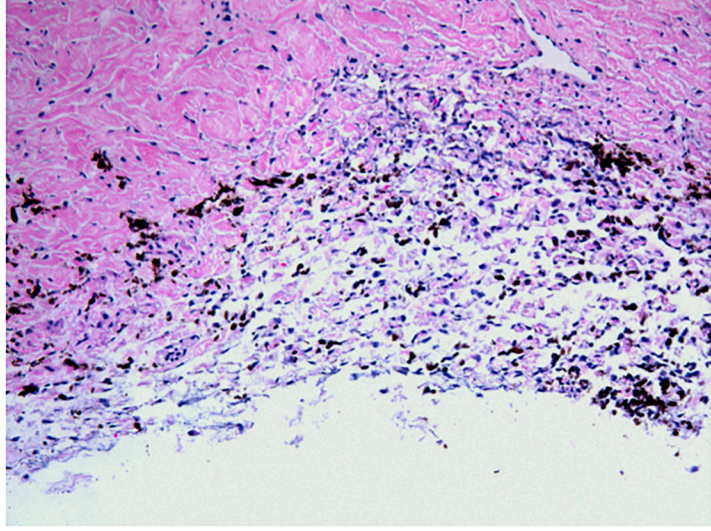

**control**

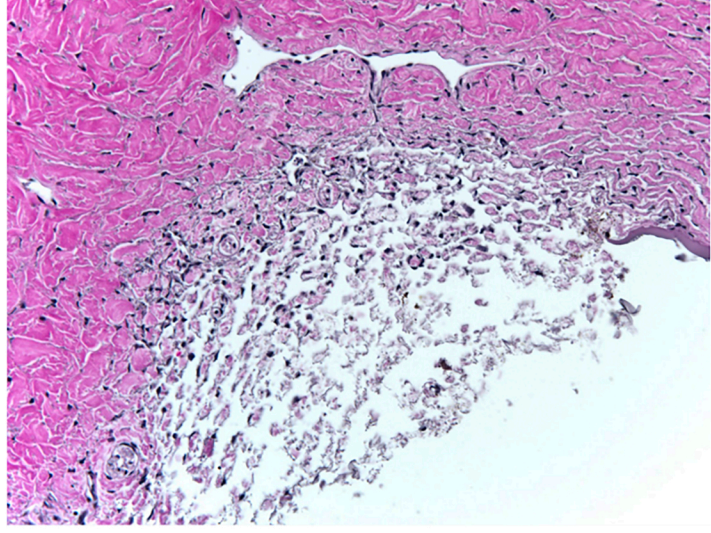

Supplement: i1552-5783-57-3-1338-s01.pdf [file i1552-5783-57-3-1338-s01.pdf]
